# Supplementary material
Source: PubMed Central journal article supplement (PMC3632485)
Supplement: 4ffff3f55a084cbf2d5a771b81b1a636_genetics.112.148999-5.pdf [file 4ffff3f55a084cbf2d5a771b81b1a636_genetics.112.148999-5.pdf]

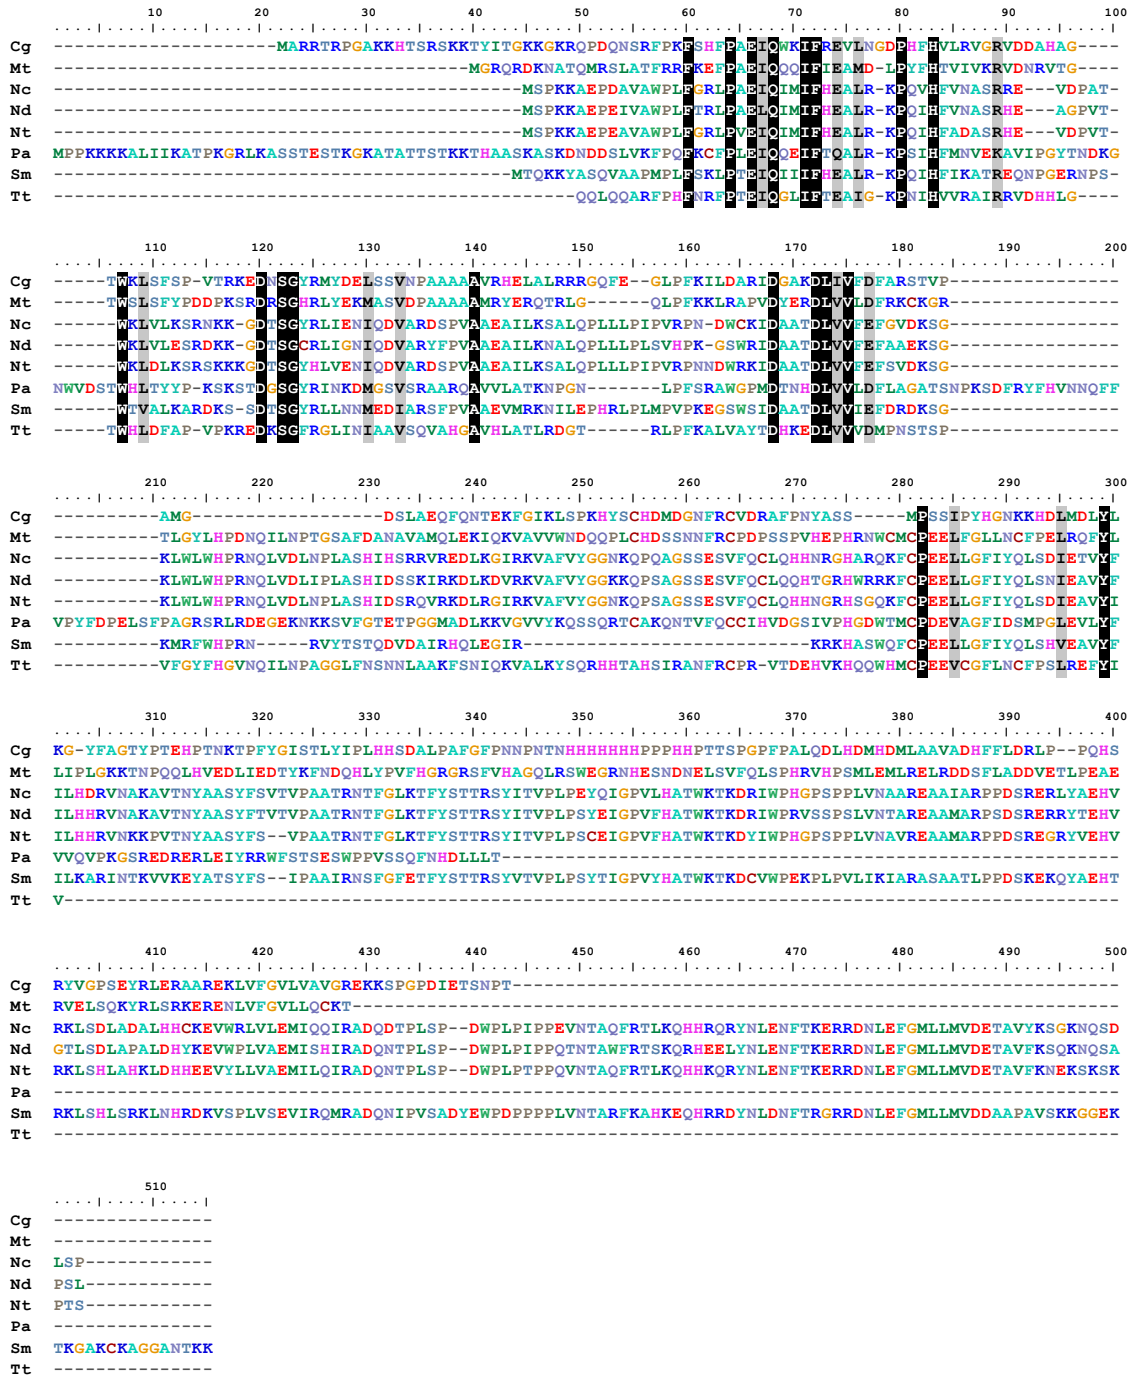

Figure S2 Alignment of SAD-5 homologs. Strain names and sequence accession numbers are listed in Table S2.
