# Supplementary material
Source: PubMed Central journal article supplement (PMC3632485)
Supplement: 6b0433eb57a4ff482843f278ee92e1d0_genetics.112.148999-8.pdf [file 6b0433eb57a4ff482843f278ee92e1d0_genetics.112.148999-8.pdf]

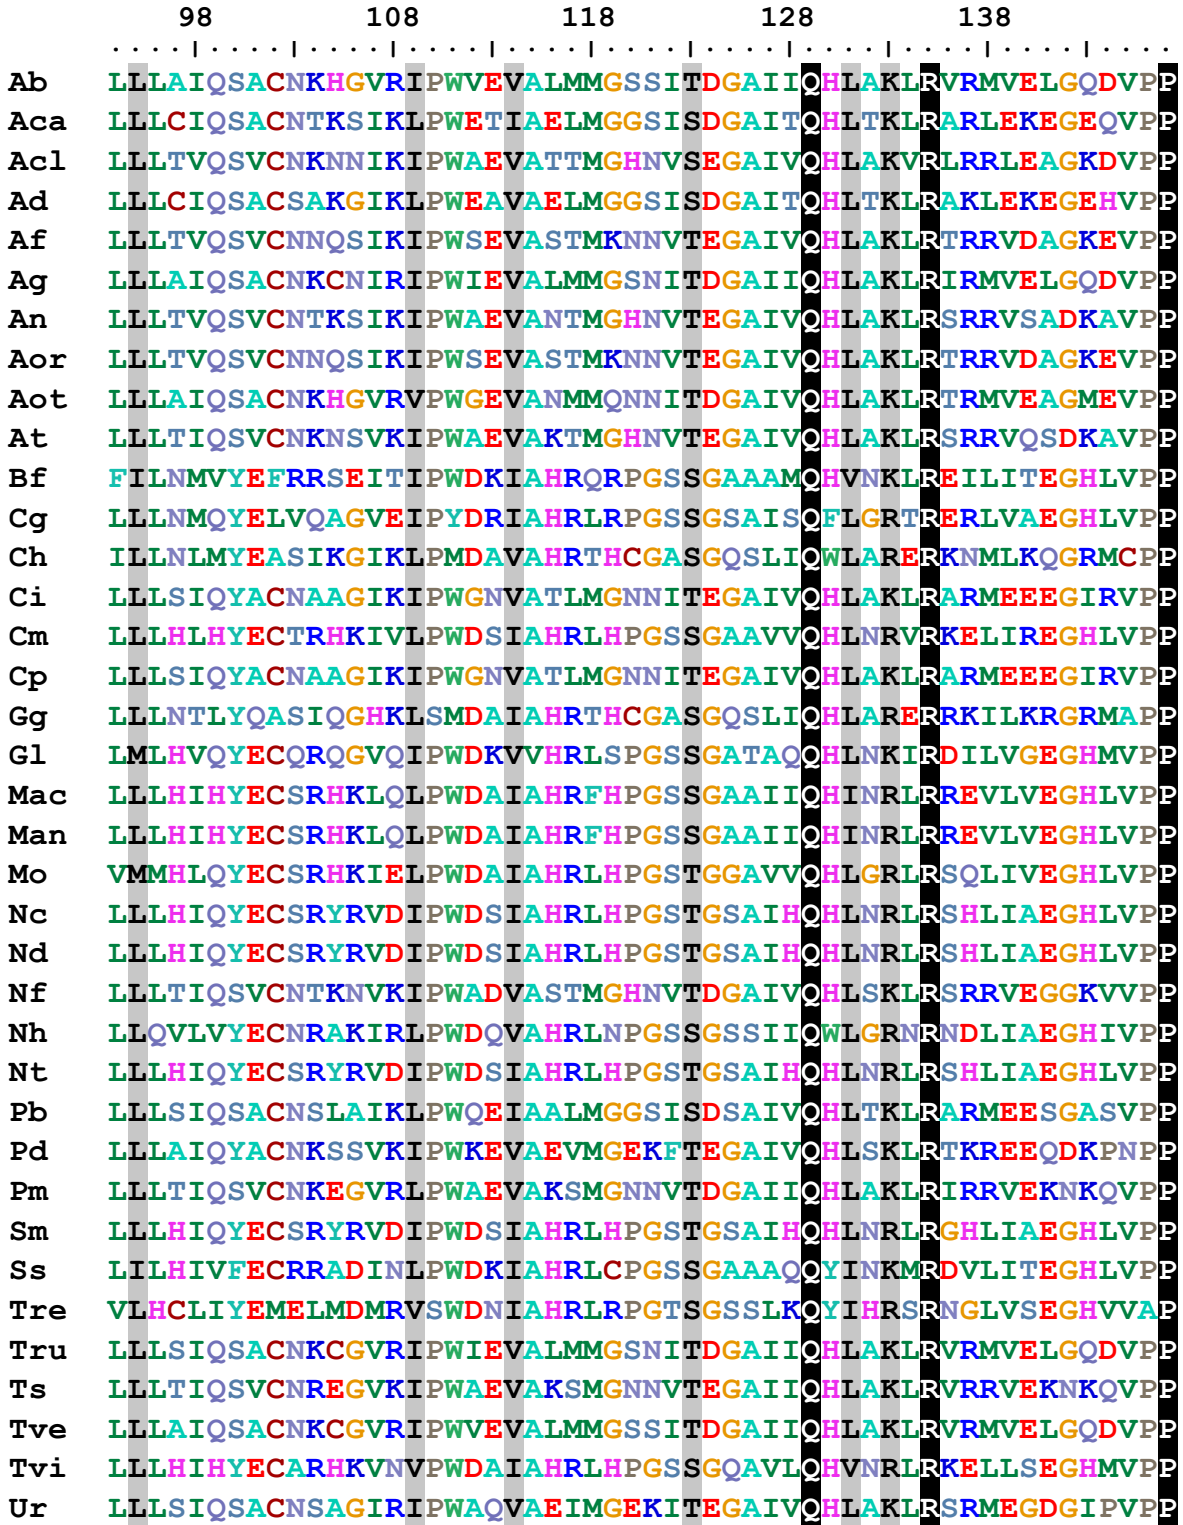

**Figure S1** Conserved region in SAD-4 homologs. Positions are relative to *N. crassa* SAD-4. Strain names and sequence accession numbers are listed in Table S2.
