# Supplementary material
Source: PubMed Central journal article supplement (PMC3632485)
Supplement: 7e6c03af2c1af5480cc491767ed2c23e_genetics.112.148999-3.pdf [file 7e6c03af2c1af5480cc491767ed2c23e_genetics.112.148999-3.pdf]

**Table S3 Small RNA sequencing and alignment data**

|                                     | $r^{\Delta} \times r^{+}$ | $r^{\Delta}4^{\Delta} \times r^{+}4^{\Delta}$ | $r^{\Delta}5^{\Delta} \times r^{+}5^{\Delta}$ | $r^{+} \times r^{+}$ |
|-------------------------------------|---------------------------|-----------------------------------------------|-----------------------------------------------|----------------------|
| Raw reads                           | 58,558,484                | 31,162,221                                    | 31,162,221                                    | 36,467,267           |
| $\geq 14$ nt after adapter trimming | 55,022,756                | 26,001,036                                    | 22,318,233                                    | 32,655,370           |
| Homology with the genome            | 51,641,029                | 24,578,034                                    | 20,920,863                                    | 30,650,403           |
| 18-30 nt long                       | 33,392,504                | 15,763,605                                    | 14,098,686                                    | 20,701,772           |
| No mismatches                       | 30,016,594                | 14,093,205                                    | 12,738,940                                    | 18,758,512           |

Shown are numbers of small RNA reads after each processing step. See Figure 6 for cross information.
