# Supplementary material
Source: PubMed Central journal article supplement (PMC3632485)
Supplement: 6593607cbca85446ae37bd75097aaeff_genetics.112.148999-2.pdf [file 6593607cbca85446ae37bd75097aaeff_genetics.112.148999-2.pdf]

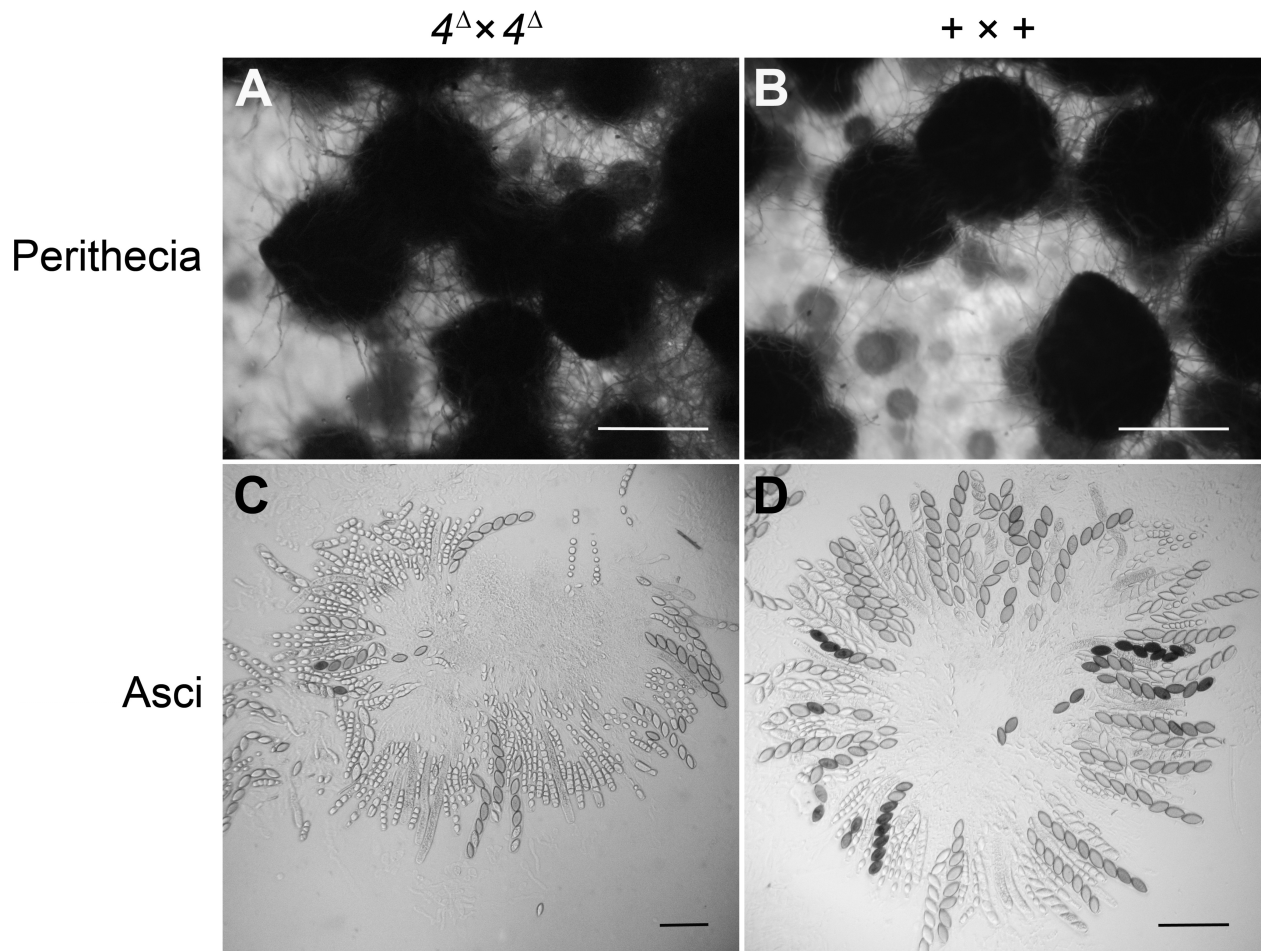

**Figure S4** Crosses homozygous for *sad-4*<sup>Δ</sup> produce fewer ascospores. (A and B) No differences in perithecial development and abundance were detected between *sad-4*<sup>Δ</sup> (F5-32 × P17-62) and control (F5-23 × P3-08) crosses. Bars, 500 μm. (C and D) *sad-4*-null crosses produce more aborted (bubble) asci. Bars, 100 μm.
