# Supplementary material
Source: PubMed Central journal article supplement (PMC3632485)
Supplement: aaf2d0dd0fbd1d2927f2780999454575_genetics.112.148999-6.pdf [file aaf2d0dd0fbd1d2927f2780999454575_genetics.112.148999-6.pdf]

**Table S2 Sequences used in this study**

| Protein | Abbreviation <sup>1</sup>   | Accession # <sup>2</sup>                 | Strain                                         |
|---------|-----------------------------|------------------------------------------|------------------------------------------------|
| SAD-4   | Ab                          | XM_003014454.1                           | <i>Arthroderma benhamiae</i> CBS 112371        |
|         | Aca                         | XM_001539307.1                           | <i>Ajellomyces capsulatus</i> NAM1             |
|         | Acl                         | XM_001267850.1                           | <i>Aspergillus clavatus</i> NRRL 1             |
|         | Ad                          | XM_002623645.1                           | <i>Ajellomyces dermatitidis</i> SLH14081       |
|         | Af                          | XM_002377995.1                           | <i>Aspergillus flavus</i> NRRL3357             |
|         | Ag                          | XM_003173571.1                           | <i>Arthroderma gypseum</i> CBS 118893          |
|         | An                          | XM_001395616.2                           | <i>Aspergillus niger</i> CBS 513.88            |
|         | Aor                         | XM_001826292.2                           | <i>Aspergillus oryzae</i> RIB40                |
|         | Aot                         | XM_002844811.1                           | <i>Arthroderma otae</i> CBS 113480             |
|         | At                          | XM_001218470.1                           | <i>Aspergillus terreus</i> NIH2624             |
|         | Bf                          | CCD55484.1                               | <i>Botryotinia fuckeliana</i>                  |
|         | Cg                          | XP_001228162.1                           | <i>Chaetomium globosum</i> CBS 148.51          |
|         | Ch                          | CCF43159.1                               | <i>Colletotrichum higginsianum</i>             |
|         | Ci                          | XM_001242382.1                           | <i>Coccidioides immitis</i> RS                 |
|         | Cm                          | EGX93189.1                               | <i>Cordyceps militaris</i> CM01                |
|         | Cp                          | XM003069573.1                            | <i>Coccidioides posadasii</i> C735 delta SOWgp |
|         | Gg                          | EFQ30009.1                               | <i>Glomerella graminicola</i> M1.001           |
|         | Gl                          | EHK98895.1                               | <i>Glarea lozoyensis</i> 74030                 |
|         | Mac                         | EFY84375.1                               | <i>Metarhizium acridum</i> CQMa 102            |
|         | Man                         | EFY96871.1                               | <i>Metarhizium anisopliae</i> ARSEF 23         |
|         | Mo                          | XM_360623.1                              | <i>Magnaporthe oryzae</i> 70-15                |
|         | Nc                          | BK006474                                 | <i>Neurospora crassa</i> OR74A                 |
|         | Nd                          | 102414 <sup>3</sup>                      | <i>Neurospora discreta</i> 8579 mat A          |
|         | Nf                          | XM_001260425.1                           | <i>Neosartorya fischeri</i> NRRL 181           |
|         | Nh                          | XP_003051566.1                           | <i>Nectria haematococca</i> mpVI 77-13-4       |
|         | Nt                          | EGO56400.1                               | <i>Neurospora tetrasperma</i> FGSC 2508        |
|         | Pb                          | XM_002789947.1                           | <i>Paracoccidioides brasiliensis</i> Pb01      |
|         | Pd                          | EKV11485.1                               | <i>Penicillium digitatum</i> PHI26             |
|         | Pm                          | XM_002149363.1                           | <i>Penicillium marneffeii</i> ATCC 18224       |
|         | Sm                          | XP_003350666.1 <sup>4</sup>              | <i>Sordaria macrospora</i> k-hell              |
|         | Ss                          | XP_001597890.1                           | <i>Sclerotinia sclerotiorum</i> 1980           |
|         | Tre                         | EGR52832.1                               | <i>Trichoderma reesei</i> QM6a                 |
|         | Tru                         | XM_003235041.1                           | <i>Trichophyton rubrum</i> CBS 118892          |
| Ts      | XM_002484729.1              | <i>Talaromyces stipitatus</i> ATCC 10500 |                                                |
| Tve     | XM_003019899.1              | <i>Trichophyton verrucosum</i> HKI 0517  |                                                |
| Tvi     | EHK24463.1                  | <i>Trichoderma virens</i> Gv29-8         |                                                |
| Ur      | XM_002544541.1              | <i>Uncinocarpus reesii</i> 1704          |                                                |
| SAD-5   | Cg                          | XP_001227787.1                           | <i>Chaetomium globosum</i> CBS 148.51          |
|         | Mt                          | XP_003665043.1                           | <i>Myceliophthora thermophila</i> ATCC 42464   |
|         | Nc                          | BK006779                                 | <i>Neurospora crassa</i> OR74A                 |
|         | Nd                          | 62731 <sup>3</sup>                       | <i>Neurospora discreta</i> 8579 mat A          |
|         | Nt                          | EGO55361.1                               | <i>Neurospora tetrasperma</i> FGSC 2508        |
|         | Sm                          | XP_003344714.1                           | <i>Sordaria macrospora</i> k-hell              |
|         | Pa                          | XP_001905702.1                           | <i>Podospira anserina</i> S mat+               |
| Tt      | XP_003654540.1 <sup>5</sup> | <i>Thielavia terrestris</i> NRRL 8126    |                                                |

<sup>1</sup>Abbreviations are used in Figures S1 and S2. <sup>2</sup>GenBank accession numbers are listed unless otherwise stated. <sup>3</sup>*N. discreta* database at DOE-JGI (<http://genome.jgi-psf.org/>). <sup>4</sup>A putative intron was removed from its ORF. <sup>5</sup>This sequence is incomplete.
