# Supplementary material
Source: PubMed Central journal article supplement (PMC3632485)
Supplement: ba90f7ea9fdd0315759db0ba36e2cc4a_genetics.112.148999-4.pdf [file ba90f7ea9fdd0315759db0ba36e2cc4a_genetics.112.148999-4.pdf]

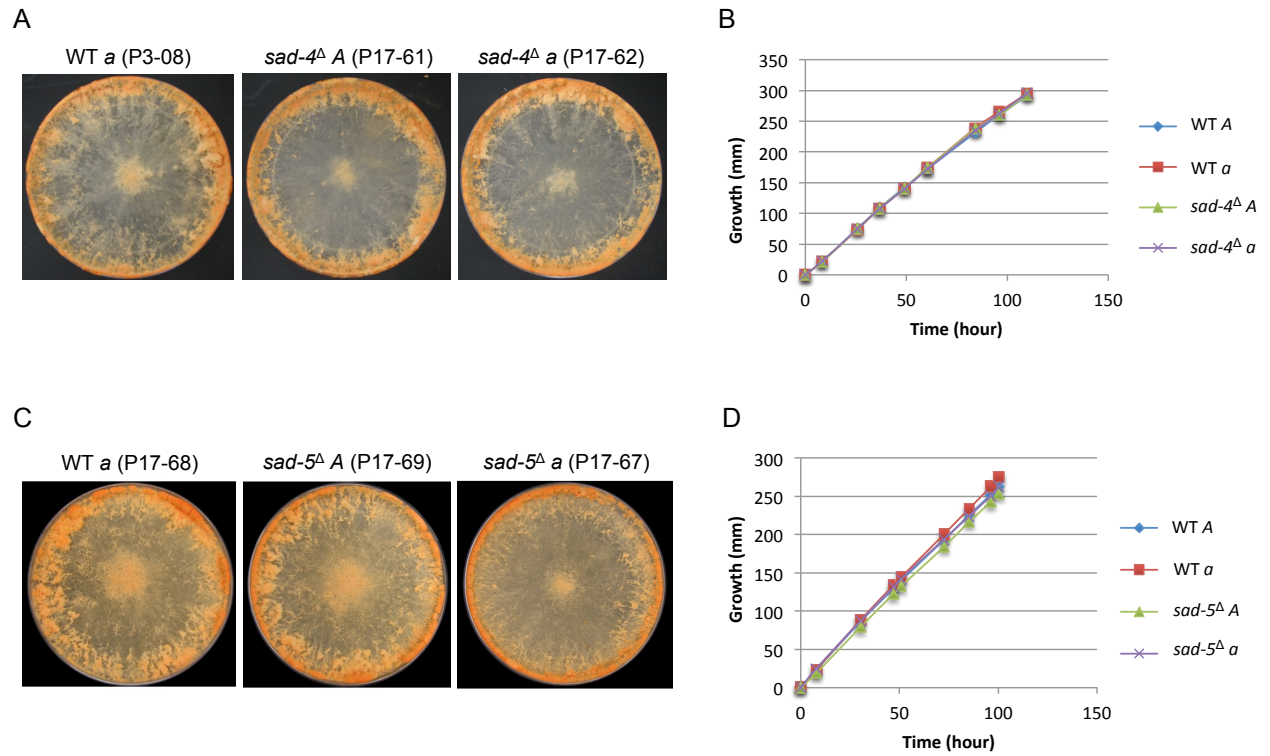

**Figure S3** *sad-4* and *sad-5* mutants appear normal during the vegetative phase. *sad-4<sup>Δ</sup>* and *sad-5<sup>Δ</sup>* strains have normal mycelial morphology (A and C) and growth (B and D).
