# Supplementary material
Source: PubMed Central journal article supplement (PMC3632485)
Supplement: e59c47151e369ee5720ef62f3f7e1279_genetics.112.148999-7.pdf [file e59c47151e369ee5720ef62f3f7e1279_genetics.112.148999-7.pdf]

**Table S1 Primers used in this study**

| Purpose                                    | Primer                | Sequence (5' to 3')                                  |
|--------------------------------------------|-----------------------|------------------------------------------------------|
| <i>sad-4<sup>Δ</sup>::hph</i> confirmation | NCU01591-294825F      | TGGCATGAGACTGGCATCTGAG                               |
|                                            | NCU01591-299764R      | GCAGAAGCGGAAGACATGTCAAG                              |
| <i>sad-5<sup>Δ</sup>::hph</i> confirmation | NCU06147-438124F      | GACCATGGCCACGACTACAGCTAC                             |
|                                            | NCU06147-442142R      | ATATGAGACCTGCGCGCTAGCCAAC                            |
| <i>rfp-sad-4</i> construction              | NCU01591-296360F*NotI | GTCTAGCGGCCGCGATCATATCAAG                            |
|                                            | NCU01591-298299R*SpeI | CCAGACTAGTCTTCGAATACTAAAATG                          |
| <i>gfp-sad-5</i> construction              | NCU06147-E            | TCTGCGGAACAATATGAACAACCTG                            |
|                                            | NCU06147-F            | AGGACAACCCTCCACTCGCAAAG                              |
|                                            | NCU06147-G            | AGGCTCGAACTCCCGACCTCA                                |
|                                            | NCU06147-H            | CCGCTTACGGGCTGCGTTGAC                                |
|                                            | NCU06147-NGFP1        | GCAGCCTGAATGGCGAATGGACGCGCAGCTGAGACGAGGTGCCGAAAG     |
|                                            | NCU06147-NGFP2        | CAGGAGCGGGTGCGGGTCTGGAGCGATGAGTCCCAAAAAGGCCGAGCCTGAC |
| <i>sad-1</i> cDNA amplification            | SAD1-4489F            | ATGCTCATCTGGCGACAGCAGATG                             |
|                                            | SAD1-4796R            | TTCTCTTTCATGTCTGAATGTTTCCC                           |
| <i>sad-4</i> cDNA amplification            | NCU01591-296801F      | CTGGTGTAGCCGTTGTGGTTCG                               |
|                                            | NCU01591-298048R      | GCGTCGAAGGCAGGAACCTTGAT                              |
| <i>sad-5</i> cDNA amplification            | NCU06147-F2-TH        | CGCTTTCGTTTACGGTGGAAC                                |
|                                            | NCU06147-R2-TH        | GGCCAGATGCGATCCTTTGTCT                               |
| <i>actin</i> cDNA amplification            | ACT-507F              | CGTTGGTCGTCCCGTTATCATG                               |
|                                            | ACT-811R              | TGGGAGCCTCGGTAAGAAGGACG                              |
